# Supplementary material
Source: MDPI journal article supplement (https://www.mdpi.com/2311-7524/8/9/848)

**Table S1.** Mean values of the initial nutrient composition in the bagged pruning and garden waste. Data not sharing a common letter are statistically different in nutrient content (Tukey's test,  $p < 0.05$ ). Standard deviation in brackets.

|            | Initial Nutrient Composition |                         |                     |                |
|------------|------------------------------|-------------------------|---------------------|----------------|
|            | Avocado pruning waste        | Cherimoya pruning waste | Mango pruning waste | Garden waste   |
| Fe (mg/kg) | 109.9 (12.6) a               | 123.7 (6.3) a           | 201 (11.6) a        | 123.7 (26.9) a |
| Cu (mg/kg) | 6.6 (0.0) a                  | 4.7 (0.5) a             | 4.7 (0.5) a         | 5.8 (0.0) a    |
| Mn (mg/kg) | 49.2 (3.8) a                 | 20.4 (2.8) a            | 58.6 (2.6) a        | 38.1 (0.8) a   |
| Zn (mg/kg) | 13.8 (1.0) a                 | 10.5 (2.0) a            | 11.1 (0.5) a        | 14.6 (2.6) a   |
| P (%)      | 0.1 (0.0) a                  | 0.1 (0.0) a             | 0.2 (0.0) a         | 0.3 (0.0) b    |
| K (%)      | 0.5 (0.0) a                  | 0.3 (0.0) b             | 0.5 (0.0) a         | 0.6 (0.0) a    |
| Na (%)     | 0.1 (0.0) a                  | 0.1 (0.0) a             | 0.1 (0.0) a         | 0.1 (0.0) a    |
| Ca (%)     | 0.3 (0.0) a                  | 0.2 (0.0) a             | 0.2 (0.0) a         | 0.2 (0.0) a    |
| Mg (%)     | 0.5 (0.0) a                  | 0.4 (0.1) ab            | 0.0 (0.0) b         | 0.0 (0.0) b    |
| C (%)      | 47.4 (0.1) a                 | 47.4 (0.2) a            | 45.7 (0.1) a        | 45.6 (0.1) a   |
| N (%)      | 0.5 (0.1) a                  | 0.7 (0.1) a             | 0.6 (0.0) a         | 0.8 (0.1) a    |
| C/N        | 90.2 (9.9) a                 | 70.3 (8.9) a            | 73.5 (0.9) a        | 59.1 (4.6) a   |

**Table S2.** Distribution of the nutrient content (mean values and standard deviation, sd) in mg per 100 g of fruit (DM, dry matter), and in g per 100 g for C and N (DM) in each of the three sampling years (2013, 2016, and 2017) and the three parts of the avocado fruits (peel, pulp, and seed) for the different treatment of pruning waste application. Lowercase letters represent significant differences among the years of study (Tukey test  $p < 0.05$ ). ANOVA  $p$  values results for the effects of treatments application at  $p < 0.05^*$ ,  $p < 0.01^{**}$  and  $p < 0.001^{***}$  n.s. not significant at a  $p < 0.05$ .

|       |        | MANGO |       | AVOCADO |       | CHERIMOYA |        | GARDEN |        | CONTROL |       |         |
|-------|--------|-------|-------|---------|-------|-----------|--------|--------|--------|---------|-------|---------|
| 2013  |        |       |       |         |       |           |        |        |        |         |       |         |
|       |        | mean  | sd    | mean    | sd    | mean      | sd     | mean   | sd     | mean    | sd    | p value |
| PEEL  | Fe     | 60.2  | 6.18  | 59.91   | 7.4   | 56.32     | 3.71   | 59.33  | 6.45   | 60.12   | 8.94  | n.s.    |
|       | Cu     | 5.67  | 0.64  | 5.63    | 0.44  | 5.35      | 0.73   | 5.51   | 0.51   | 5.63    | 0.6   | n.s.    |
|       | Mn     | 8.32  | 0.68  | 8.61    | 1.01  | 8.46      | 0.96   | 8.85   | 1.09   | 8.79    | 1.32  | n.s.    |
|       | Zn     | 9.54  | 1.01  | 9.63    | 1.34  | 9.23      | 0.99   | 9.35   | 1.15   | 9.63    | 1.13  | n.s.    |
|       | P      | 2461  | 739   | 2314    | 573   | 2254      | 423    | 2479   | 768    | 2301    | 593   | n.s.    |
|       | K      | 41791 | 3839  | 42834   | 3887  | 39214     | 4389   | 41257  | 3707   | 41742   | 3639  | n.s.    |
|       | Na     | 1600  | 248   | 1612    | 235   | 1485      | 168    | 1587   | 207    | 1603    | 191   | n.s.    |
|       | Ca     | 2004  | 316   | 1901    | 214   | 1925      | 188    | 1938   | 190    | 2083    | 225   | n.s.    |
|       | Mg     | 2012  | 211   | 2051    | 167   | 1956      | 206    | 1929   | 112    | 2059    | 214   | n.s.    |
|       | C      | 51.12 | 1.55  | 50.45   | 1.11  | 50.2      | 0.99   | 50.14  | 1.28   | 50.22   | 1.87  | n.s.    |
| N     | 1.10ab | 0.09  | 1.14b | 0.1     | 1.03a | 0.08      | 1.07ab | 0.11   | 1.06ab | 0.08    | 0.01* |         |
| PULP  | Fe     | 51.27 | 5.43  | 54.25   | 7.99  | 51.38     | 4.18   | 51.14  | 5.01   | 54.04   | 4.73  | n.s.    |
|       | Cu     | 9.37  | 1     | 10.12   | 1.34  | 9.66      | 1.06   | 9.33   | 0.71   | 10.19   | 0.92  | n.s.    |
|       | Mn     | 6.55  | 0.78  | 7.06    | 0.6   | 7.48      | 1.16   | 6.78   | 0.78   | 6.96    | 1.23  | n.s.    |
|       | Zn     | 14.42 | 2.5   | 15.19   | 2.52  | 13.17     | 1.96   | 13.84  | 1.22   | 13.25   | 2.39  | n.s.    |
|       | P      | 2790  | 488   | 2949    | 553   | 2589      | 615    | 2453   | 661    | 2707    | 760   | n.s.    |
|       | K      | 32353 | 4354  | 33568   | 3000  | 33425     | 5290   | 34476  | 3634   | 32088   | 4077  | n.s.    |
|       | Na     | 2071  | 238   | 1972    | 228   | 1950      | 226    | 1996   | 170    | 1917    | 195   | n.s.    |
|       | Ca     | 1894  | 212   | 1802    | 245   | 1862      | 197    | 1911   | 199    | 1826    | 159   | n.s.    |
|       | Mg     | 2387  | 341   | 2421    | 251   | 2353      | 310    | 2258   | 243    | 2354    | 207   | n.s.    |
|       | C      | 65.39 | 1.61  | 64.85   | 2.29  | 65.8      | 1.8    | 66.89  | 5.19   | 66.59   | 1.86  | n.s.    |
| N     | 0.95   | 0.13  | 0.99  | 0.21    | 0.92  | 0.172     | 0.97   | 0.13   | 0.91   | 0.13    | n.s.  |         |
| STONE | Fe     | 36.21 | 3.05  | 35.87   | 3.24  | 35.87     | 2.24   | 38.54  | 3.85   | 37.66   | 4.33  | n.s.    |
|       | Cu     | 5.41  | 1.05  | 5.28    | 0.6   | 5.24      | 0.68   | 5.43   | 0.58   | 5.62    | 0.65  | n.s.    |
|       | Mn     | 7.57  | 1.01  | 8.38    | 0.96  | 7.97      | 0.8    | 7.76   | 1.21   | 8       | 0.91  | n.s.    |
|       | Zn     | 10.21 | 1.21  | 10.4    | 1.01  | 9.86      | 0.83   | 10.31  | 1.24   | 10.53   | 1.07  | n.s.    |
|       | P      | 1997  | 543   | 2018    | 561   | 1979      | 537    | 2058   | 832    | 2160    | 574   | n.s.    |
|       | K      | 20463 | 2917  | 20065   | 2612  | 17968     | 2425   | 19492  | 2216   | 19894   | 2285  | n.s.    |
|       | Na     | 1625  | 170   | 1602    | 133   | 1602      | 109    | 1613   | 251    | 1690    | 94    | n.s.    |
|       | Ca     | 1772  | 234   | 1773    | 263   | 1778      | 228    | 1851   | 233    | 1832    | 264   | n.s.    |
|       | Mg     | 1890  | 192   | 1842    | 155   | 1896      | 262    | 1867   | 179    | 1869    | 237   | n.s.    |
|       | C      | 45.8  | 1.66  | 46.52   | 2.03  | 45.17     | 0.71   | 45.5   | 1.92   | 46.18   | 1.4   | n.s.    |
| N     | 0.75   | 0.12  | 0.72  | 0.16    | 0.7   | 0.11      | 0.69   | 0.13   | 0.67   | 0.13    | n.s.  |         |

| 2016  |    |         |       |         |       |         |       |         |       |         |       |           |
|-------|----|---------|-------|---------|-------|---------|-------|---------|-------|---------|-------|-----------|
|       |    | mean    | sd    | treatment |
| PEEL  | Fe | 32.57ab | 13.3  | 36.92ab | 13.5  | 42.25b  | 15.18 | 41.13ab | 16.23 | 27.14a  | 15.67 | 0.030*    |
|       | Cu | 7.64ab  | 1.83  | 8.87b   | 2.19  | 6.46a   | 1.64  | 7.46ab  | 1.99  | 8.04ab  | 2.8   | 0.036*    |
|       | Mn | 5.96    | 1.09  | 6.91    | 1.73  | 5.72    | 1.03  | 6.21    | 1.39  | 6.44    | 2.2   | n.s.      |
|       | Zn | 13.57   | 6.15  | 13.82   | 5.91  | 10.47   | 4.02  | 12.12   | 4.45  | 11.64   | 5.57  | n.s.      |
|       | P  | 1881ab  | 352   | 2030b   | 420   | 1561a   | 334   | 1779ab  | 594   | 1744ab  | 526   | 0.023*    |
|       | K  | 16876   | 4476  | 17418   | 3357  | 15486   | 3556  | 15023   | 2305  | 15173   | 3367  | n.s.      |
|       | Na | 435a    | 274   | 423a    | 194   | 601ab   | 393   | 782b    | 498   | 469a    | 233   | 0.017*    |
|       | Ca | 973     | 250   | 1180    | 179   | 1095    | 288   | 1097    | 330   | 1003    | 349   | n.s.      |
|       | Mg | 897     | 136   | 994     | 132   | 917     | 76    | 939     | 163   | 932     | 179   | n.s.      |
|       | C  | 52.39ab | 0.73  | 52.85b  | 0.67  | 51.83a  | 0.91  | 52.69b  | 0.84  | 52.33ab | 0.6   | 0.003**   |
|       | N  | 0.68    | 0.07  | 0.7     | 0.06  | 0.65    | 0.1   | 0.68    | 0.06  | 0.65    | 0.08  | n.s.      |
| PULP  | Fe | 24.57   | 22.44 | 30.41   | 20.47 | 21.91   | 9.11  | 29.14   | 19.7  | 29.78   | 18.46 | n.s.      |
|       | Cu | 12.24   | 2.24  | 15.25   | 4.68  | 12.81   | 2.58  | 13.88   | 3.37  | 13.87   | 4.66  | n.s.      |
|       | Mn | 5.49    | 1.68  | 6       | 1.75  | 5.22    | 1.57  | 5.6     | 1.41  | 6.26    | 2.56  | n.s.      |
|       | Zn | 13.5    | 4.85  | 14.37   | 5.06  | 12.68   | 3.3   | 15.33   | 4.43  | 14.54   | 5.12  | n.s.      |
|       | P  | 2422    | 576   | 2435    | 319   | 2448    | 326   | 2305    | 415   | 2419    | 353   | n.s.      |
|       | K  | 16663   | 3919  | 16207   | 2922  | 17474   | 2529  | 16302   | 3389  | 16733   | 3002  | n.s.      |
|       | Na | 460     | 134   | 880     | 618   | 689     | 355   | 595     | 458   | 655     | 358   | n.s.      |
|       | Ca | 1213    | 334   | 1188    | 264   | 1241    | 264   | 1323    | 324   | 1310    | 355   | n.s.      |
|       | Mg | 1003    | 120   | 1025    | 106   | 1038    | 130   | 1034    | 117   | 1030    | 158   | n.s.      |
|       | C  | 64.35   | 1.46  | 64.53   | 1.12  | 64.08   | 1.1   | 63.99   | 1.87  | 64.13   | 1.21  | n.s.      |
|       | N  | 0.70    | 0.16  | 0.69    | 0.10  | 0.72    | 0.12  | 0.71    | 0.14  | 0.70    | 0.15  | n.s.      |
| STONE | Fe | 46.21   | 14.61 | 34.85   | 17.1  | 36.2    | 12.71 | 41.43   | 16.1  | 44.45   | 15.27 | n.s.      |
|       | Cu | 8.61    | 3.16  | 9.51    | 2.77  | 6.81    | 1.17  | 8.22    | 2.78  | 7.92    | 2.3   | n.s.      |
|       | Mn | 6.81    | 3.07  | 6.2     | 3.09  | 4.81    | 1.87  | 6.04    | 3.22  | 6.06    | 2.99  | n.s.      |
|       | Zn | 7.06    | 2.66  | 7.76    | 2.77  | 7.35    | 2.43  | 7.54    | 2.74  | 7.46    | 3.2   | n.s.      |
|       | P  | 1518    | 340   | 1655    | 378   | 1442    | 284   | 1475    | 265   | 1501    | 340   | n.s.      |
|       | K  | 9263    | 1849  | 9805    | 1998  | 8098    | 1296  | 8779    | 2113  | 9001    | 2162  | n.s.      |
|       | Na | 465     | 405   | 419     | 308   | 499     | 434   | 536     | 600   | 389     | 382   | n.s.      |
|       | Ca | 1040ab  | 418   | 883a    | 328   | 976ab   | 277   | 1346b   | 517   | 1009ab  | 346   | 0.015*    |
|       | Mg | 868     | 180   | 771     | 101   | 756     | 171   | 862     | 168   | 865     | 253   | n.s.      |
|       | C  | 44.08   | 1.52  | 44.15   | 1.58  | 44.27   | 1.93  | 43.88   | 1.4   | 43.84   | 1.87  | n.s.      |
|       | N  | 0.4     | 0.06  | 0.407   | 0.069 | 0.36    | 0.06  | 0.41    | 0.05  | 0.39    | 0.07  | n.s.      |
| 2017  |    |         |       |         |       |         |       |         |       |         |       |           |
|       |    | mean    | sd    | treatment |
| PEEL  | Fe | 47.24   | 16.47 | 49.85   | 18.74 | 42.41   | 20.16 | 46.66   | 36.04 | 34.96   | 20.02 | n.s.      |
|       | Cu | 5.97    | 1.56  | 5.87    | 1.81  | 6.06    | 1.41  | 6.99    | 2.23  | 5.63    | 1.78  | n.s.      |
|       | Mn | 7.67ab  | 0.83  | 7.28a   | 1.19  | 7.62ab  | 1.01  | 9.13b   | 2.8   | 7.23a   | 3.04  | 0.003**   |
|       | Zn | 7.94    | 2.27  | 6.5     | 1.82  | 7.11    | 1.32  | 8.82    | 2.95  | 7.74    | 2.83  | n.s.      |
|       | P  | 1420    | 237   | 1325    | 170   | 1318    | 194   | 1366    | 219   | 1359    | 287   | n.s.      |
|       | K  | 14481   | 3954  | 13252   | 3144  | 12042   | 1660  | 13600   | 2909  | 12169   | 1397  | n.s.      |
|       | Na | 133     | 49    | 136     | 73    | 169     | 80    | 131     | 54    | 131     | 65    | n.s.      |
|       | Ca | 641     | 254   | 552     | 182   | 522     | 171   | 677     | 251   | 688     | 175   | n.s.      |
|       | Mg | 961     | 194   | 876     | 131   | 979     | 153   | 944     | 172   | 899     | 187   | n.s.      |
|       | C  | 49.15   | 0.83  | 49.04   | 0.83  | 48.86   | 1     | 48.65   | 0.48  | 49.03   | 0.76  | n.s.      |
|       | N  | 0.67    | 0.07  | 0.63    | 0.09  | 0.64    | 0.1   | 0.65    | 0.08  | 0.63    | 0.09  | n.s.      |
| PULP  | Fe | 43.05a  | 25.81 | 55.34ab | 24.27 | 67.01ab | 36.42 | 76.04b  | 28.91 | 60.21ab | 28.34 | 0.027*    |
|       | Cu | 7.84    | 2.39  | 7.25    | 1.81  | 7.44    | 1.84  | 8.34    | 2.61  | 6.73    | 1.15  | n.s.      |
|       | Mn | 5.53a   | 2.24  | 5.84a   | 2.2   | 5.85a   | 1.57  | 8.40b   | 3.1   | 6.40a   | 1.93  | 0.004**   |
|       | Zn | 8.67    | 3.61  | 7.57    | 2.91  | 8.32    | 2.2   | 10.16   | 4.4   | 7.65    | 2.73  | n.s.      |
|       | P  | 2518    | 497   | 2574    | 412   | 2601    | 393   | 2584    | 411   | 2364    | 434   | n.s.      |

|              |           |       |      |       |      |       |      |       |      |       |      |        |
|--------------|-----------|-------|------|-------|------|-------|------|-------|------|-------|------|--------|
|              | <b>K</b>  | 15157 | 5077 | 14321 | 4991 | 13511 | 2850 | 14893 | 6200 | 12098 | 3687 | n.s.   |
|              | <b>Na</b> | 583   | 303  | 499   | 208  | 549   | 222  | 452   | 242  | 442   | 209  | n.s.   |
|              | <b>Ca</b> | 1029  | 179  | 974   | 228  | 952   | 181  | 971   | 247  | 958   | 302  | n.s.   |
|              | <b>Mg</b> | 719   | 106  | 633   | 159  | 691   | 101  | 711   | 110  | 682   | 130  | n.s.   |
|              | <b>C</b>  | 66.28 | 2.7  | 66.9  | 3.2  | 65.95 | 2.57 | 67.05 | 2.18 | 67.2  | 2.09 | n.s.   |
|              | <b>N</b>  | 0.56  | 0.08 | 0.57  | 0.08 | 0.55  | 0.06 | 0.59  | 0.08 | 0.55  | 0.05 | n.s.   |
| <b>STONE</b> | <b>Fe</b> | 24.91 | 3.6  | 29.01 | 8.34 | 24.68 | 6.94 | 26.78 | 9.41 | 24.6  | 7.38 | n.s.   |
|              | <b>Cu</b> | 7.52  | 1.8  | 6.75  | 1.7  | 6.56  | 1.22 | 7.48  | 2.38 | 6.9   | 2.06 | n.s.   |
|              | <b>Mn</b> | 4.52  | 1.21 | 4.18  | 1.42 | 4.93  | 2.16 | 4.68  | 1.69 | 4.51  | 1.38 | n.s.   |
|              | <b>Zn</b> | 5.19  | 1.1  | 4.83  | 0.81 | 4.61  | 0.8  | 4.61  | 1.01 | 5.03  | 1.11 | n.s.   |
|              | <b>P</b>  | 1487  | 227  | 1422  | 175  | 1439  | 120  | 1344  | 116  | 1370  | 111  | n.s.   |
|              | <b>K</b>  | 6743  | 899  | 7310  | 1042 | 7187  | 1001 | 6827  | 1162 | 7211  | 1148 | n.s.   |
|              | <b>Na</b> | 228   | 83   | 200   | 47   | 201   | 62   | 214   | 53   | 181   | 82   | n.s.   |
|              | <b>Ca</b> | 403ab | 123  | 361ab | 170  | 307a  | 120  | 379ab | 111  | 466b  | 172  | 0.036* |
|              | <b>Mg</b> | 723   | 212  | 647   | 134  | 683   | 140  | 653   | 160  | 666   | 137  | n.s.   |
|              | <b>C</b>  | 42.38 | 0.89 | 42.48 | 1.34 | 42.65 | 1.03 | 42.55 | 1.17 | 42.47 | 0.86 | n.s.   |
|              | <b>N</b>  | 0.33  | 0.08 | 0.32  | 0.05 | 0.34  | 0.08 | 0.30  | 0.05 | 0.30  | 0.03 | n.s.   |

**Figure S1.** Scores and loadings for PCA performed for distribution of nutrient content among the three years of study (2013, 2016, 2017) for the total element content in the avocado fruit in each part of the fruit, peel, pulp and seed.

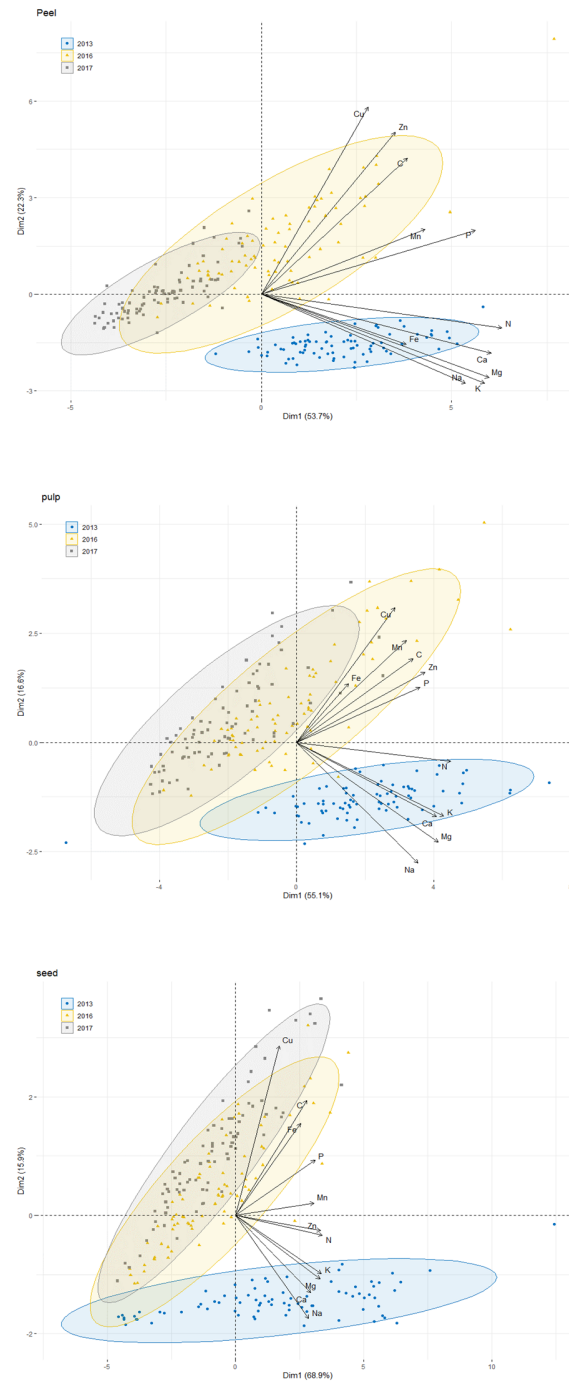

Supplement: s1 [file s1]
